# Supplementary material for: UiO-66-NH2 and Zeolite-Templated Carbon Composites for the Degradation and Adsorption of Nerve Agents
Source: MDPI journal article supplement (doi:10.3390/molecules26133837), 2021-06-23
Supplement: s1 [file s1]

## Supplementary Material

# UiO-66-NH<sub>2</sub> and Zeolite-Templated Carbon Composites for the Degradation and Adsorption of Nerve Agents

Jaeheon Lee, Dongwon Ka, Heesoo Jung, Kyeongmin Cho, Youngho Jin \* and Minkun Kim \*

Agency for Defense Development, P.O. Box 35, Yuseong-gu, Daejeon 34186, Korea; jhun0740@gmail.com (J.L.); rkehd47@gmail.com (D.K.); hsjung@add.re.kr (H.J.); kmcho@add.re.kr (K.C.)

\* Correspondence: cadetnet@add.re.kr (Y.J.); mkkim@add.re.kr (M.K.); Tel.: +82-42-821-2203 (Y.J.); Tel.: +82-42-821-2427 (M.K.)

**Table S1.** EDS elemental analysis of pristine materials and UiO-66-NH<sub>2</sub>/ZTC composites

| Element   | beta-ZTC | U <sub>0.2</sub> Z <sub>0.8</sub> | U <sub>0.8</sub> Z <sub>0.2</sub> | UiO-66-NH <sub>2</sub> |
|-----------|----------|-----------------------------------|-----------------------------------|------------------------|
| Carbon    | 94.4     | 81.51                             | 33.99                             | 22.07                  |
| Nitrogen  | -        | 0.01                              | 1.35                              | 1.85                   |
| Oxygen    | 5.6      | 12.17                             | 13.52                             | 13.69                  |
| Zirconium | -        | 6.31                              | 51.15                             | 62.39                  |

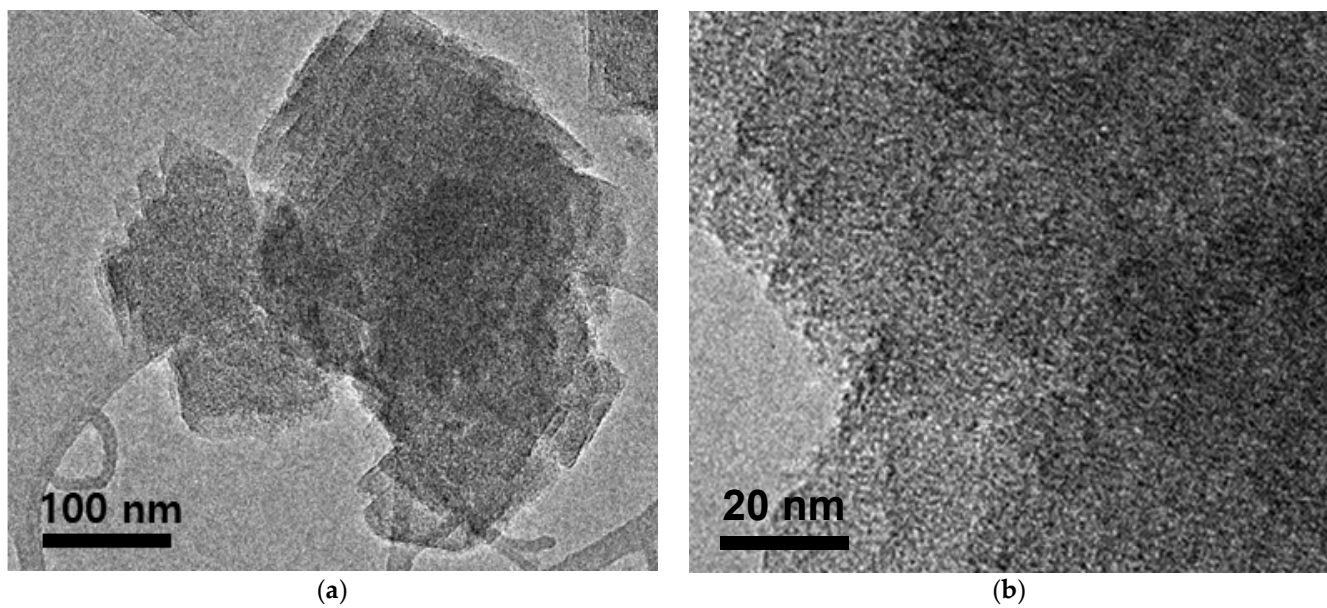

**Figure S1.** TEM images of beta-ZTC in (a) low magnification, and (b) high magnification.

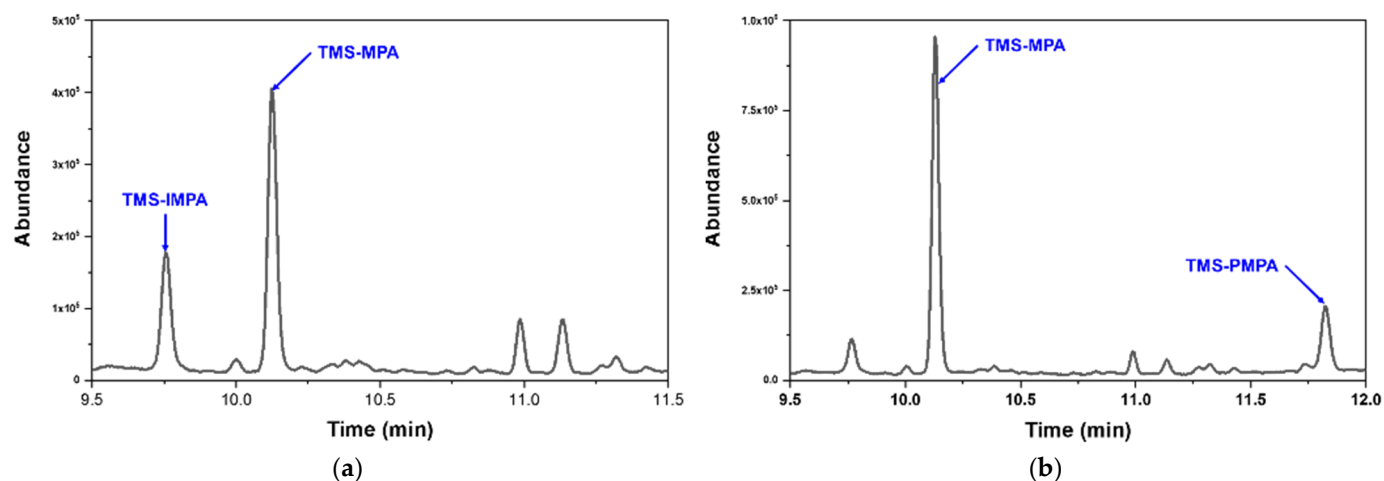

**Figure S2.** GC spectra of the reaction products from the degradation of nerve agents (a) GB and (b) GD by  $U_{0.8}Z_{0.2}$

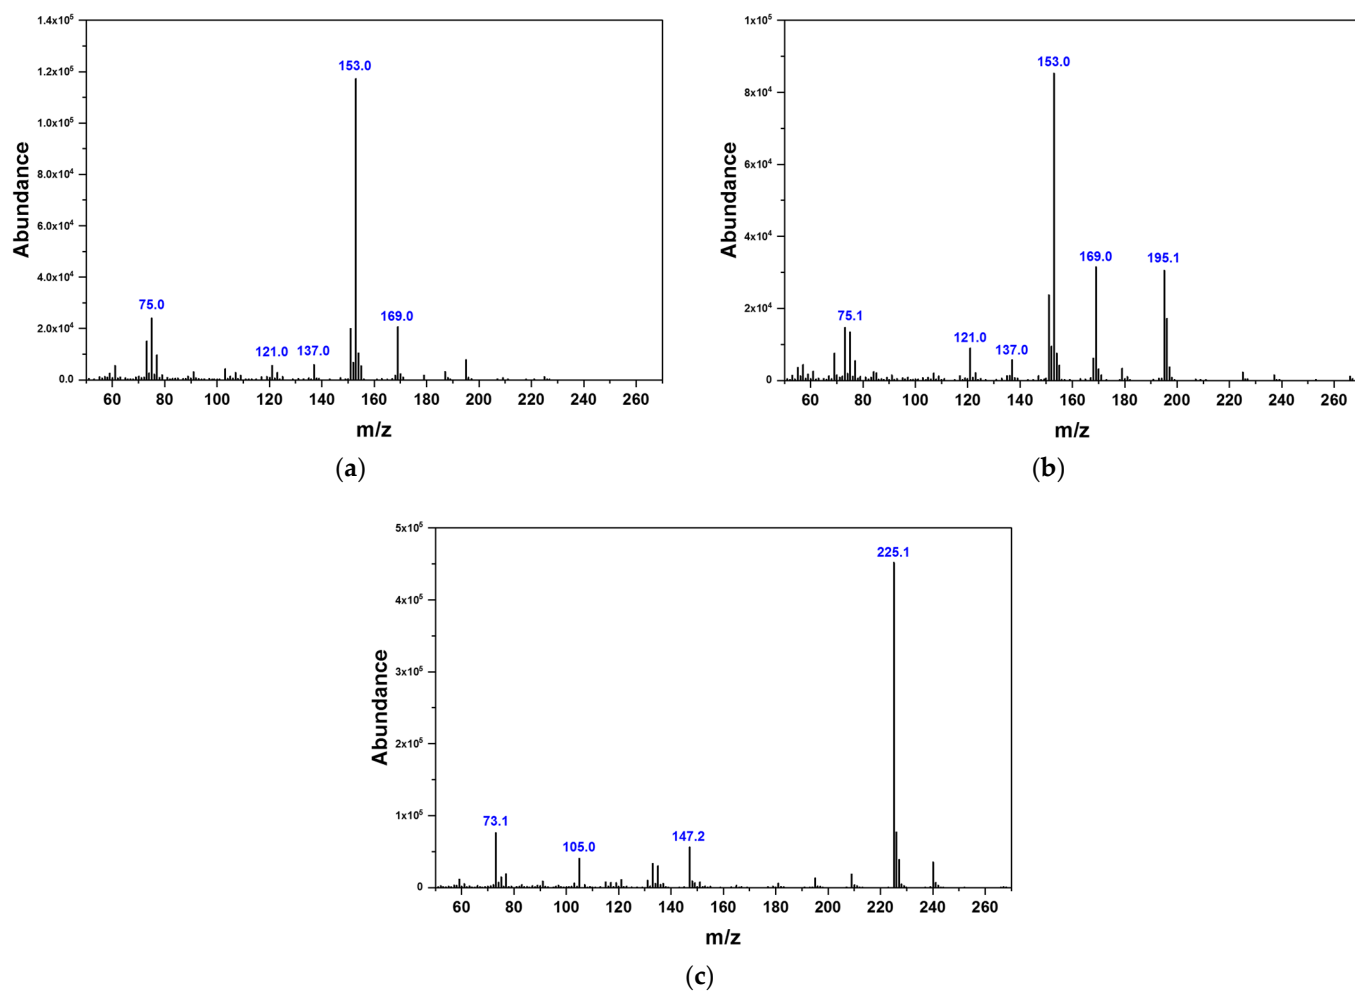

**Figure S3.** MS spectra of reaction products (a) TMS-IMPA, (b) TMS-PMPA, and (c) TMS-MPA.
